# Supplementary material for: Biocompatible MgFeCO3 Layered Double Hydroxide (LDH) for Bone Regeneration—Low-Temperature Processing through Cold Sintering and Freeze-Casting
Source: MDPI journal article supplement (doi:10.3390/bioengineering10060734), 2023-06-19
Supplement: s1 [file s1]

*Supplementary Materials*

# Biocompatible $\text{MgFeCO}_3$ Layered Double Hydroxide (LDH) for Bone Regeneration—Low-Temperature Processing through Cold Sintering and Freeze-Casting

Hyoung-Jun Kim <sup>1,2,3</sup>, Prescillia Lagarrigue <sup>1</sup>, Jae-Min Oh <sup>2,\*</sup>, Jérémy Soulié <sup>1,\*</sup>, Fabrice Salles <sup>4</sup>, Sophie Cazalbou <sup>1</sup> and Christophe Drouet <sup>1</sup>

<sup>1</sup> CIRIMAT, Université de Toulouse, CNRS, Toulouse INP, Toulouse 31030, France; christophe.drouet@cirimat.fr (C.D.)

<sup>2</sup> Research Institute, National Cancer Center, Gyeonggi 10408, Republic of Korea

<sup>3</sup> Department of Energy and Materials Engineering, Dongguk University, Seoul 04620, Republic of Korea

<sup>4</sup> Institute Charles Gerhardt des Matériaux (ICGM), Université de Montpellier, CNRS, ENSCM, Montpellier 34090, France; fabrice.salles@umontpellier.fr

\* Correspondence: jaemin.oh@dongguk.edu (J.-M.O.), jeremy.soulie@toulouse-inp.fr (J.S.)

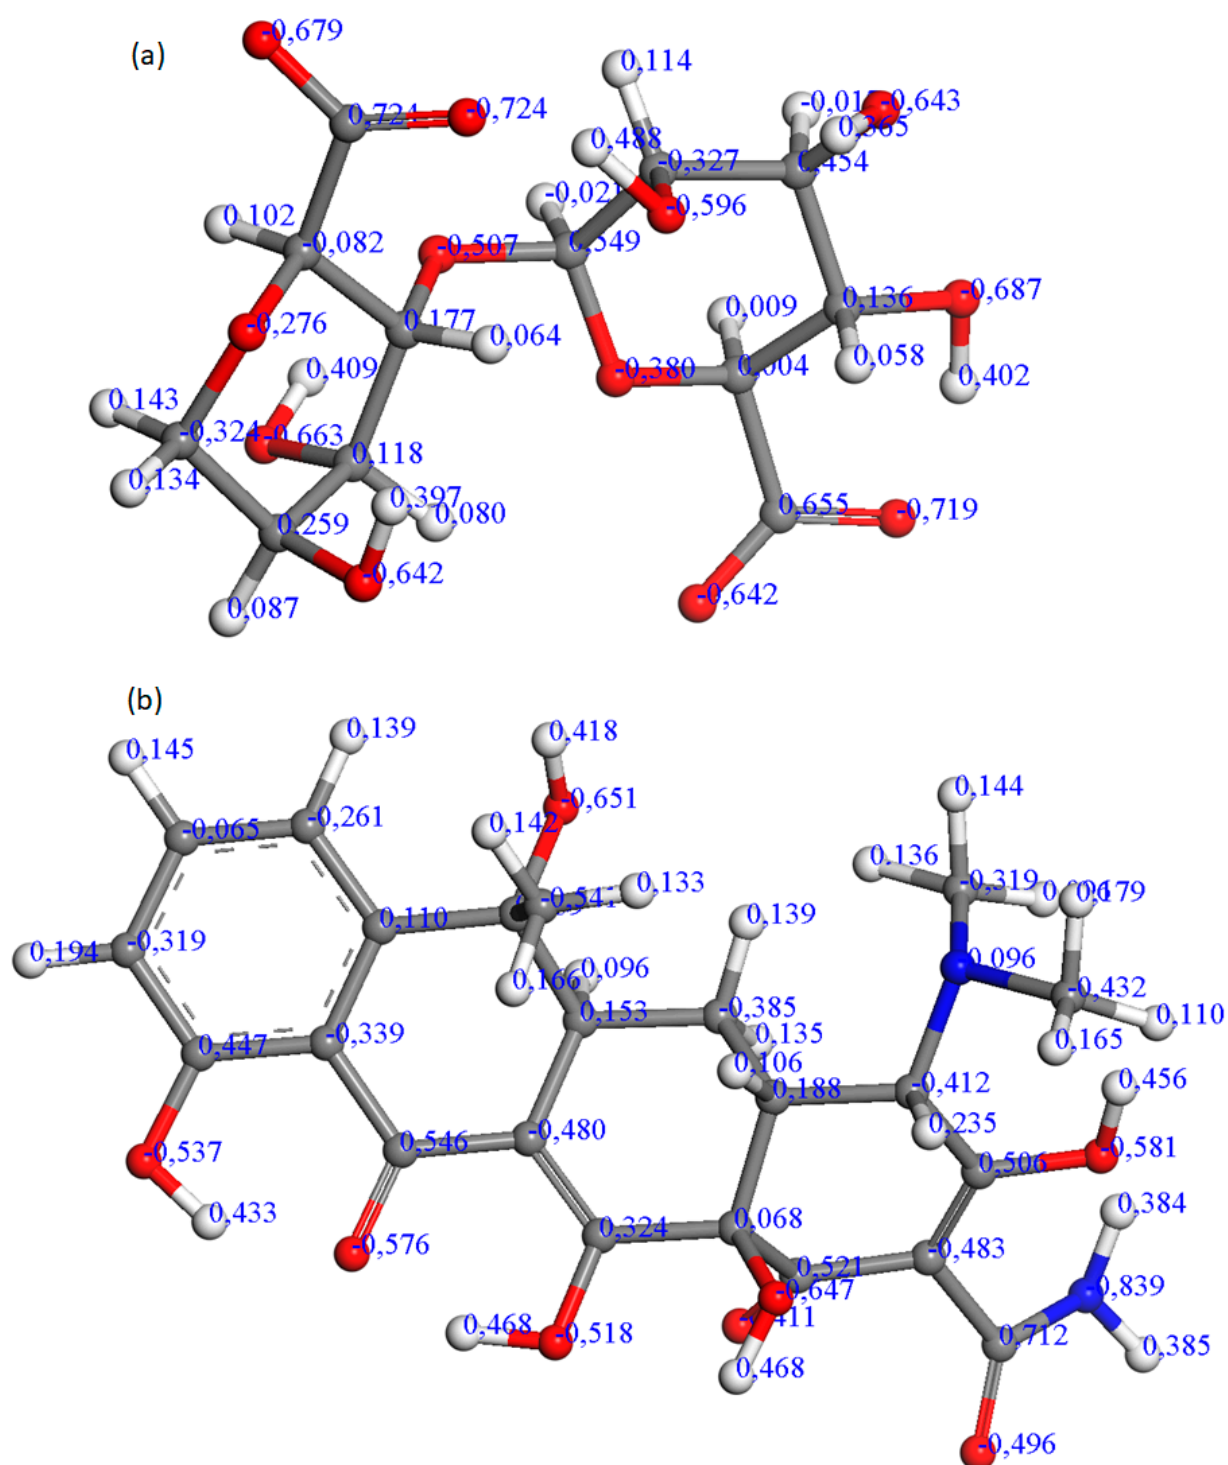

**Figure S1.** Partial charges obtained for tetracycline and alginate (charged 2-) from DFT calculations.

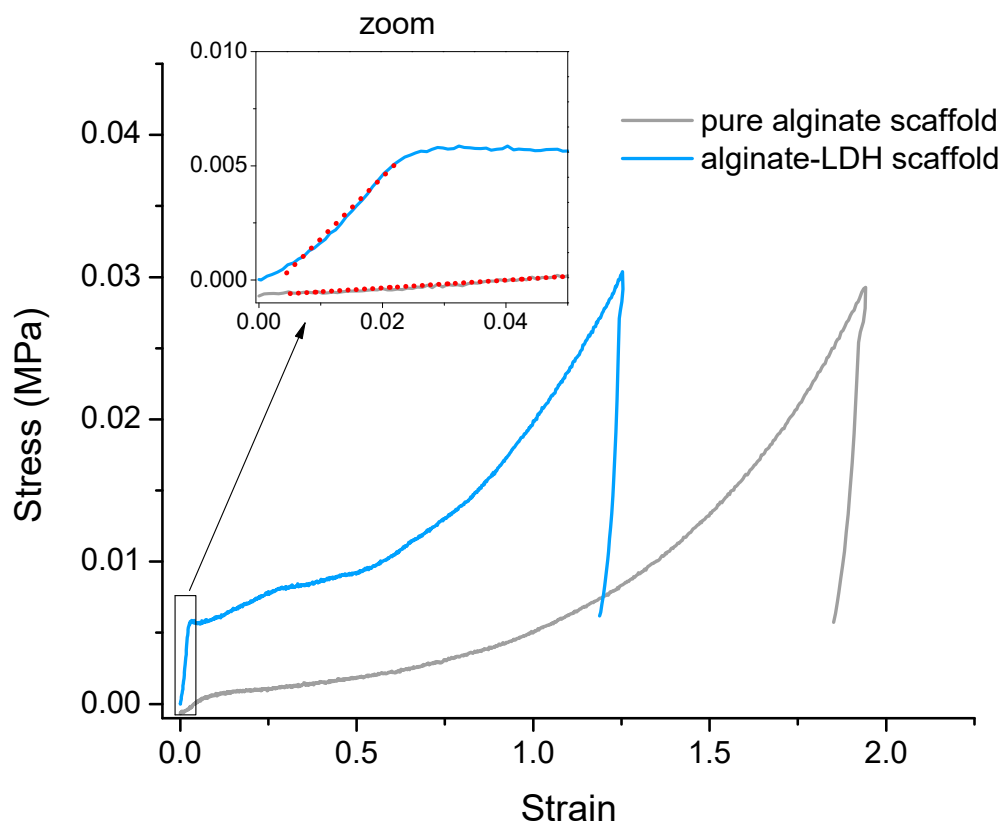

**Figure S2.** Evaluation of mechanical properties (stress-strain curves) through uniaxial compression for typical freeze-cast alginate/MgFeCO<sub>3</sub> LDH and pure alginate scaffolds. The zoomed inlet view allows better visualizing the elastic part of the curves to decipher the variation in Young modulus (slope of the red dotted lines).

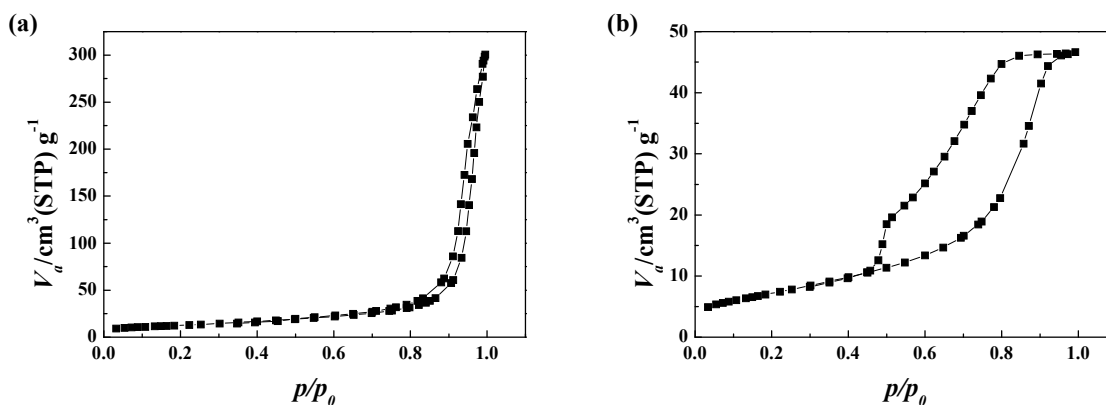

**Figure S3.** Evaluation of the porous volume by the BJH method, from processing nitrogen (N<sub>2</sub>) adsorption/desorption data: (a) MgFeCO<sub>3</sub> LDH powder, (b) SPS cold-sintered monolith.

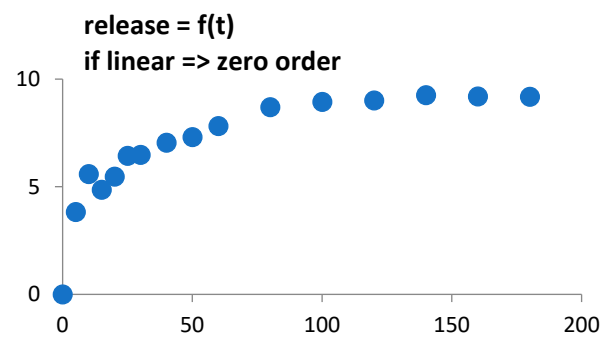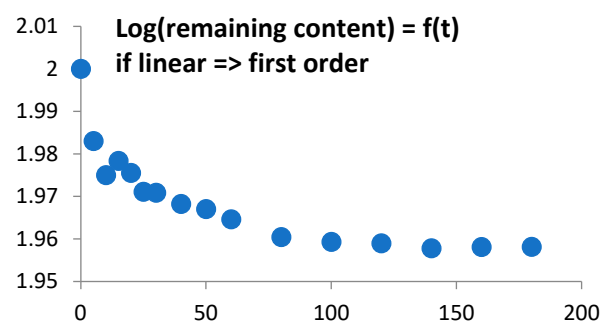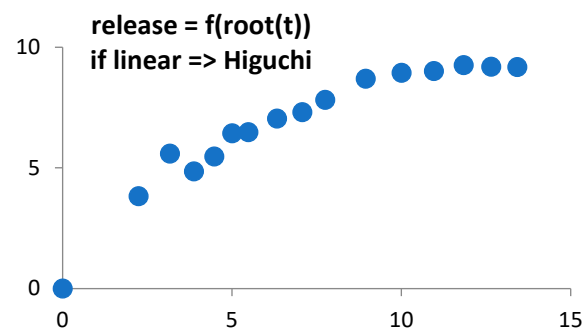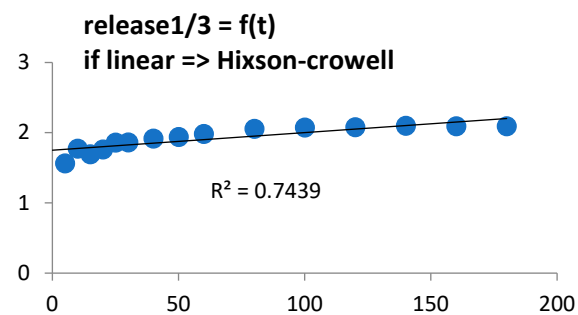

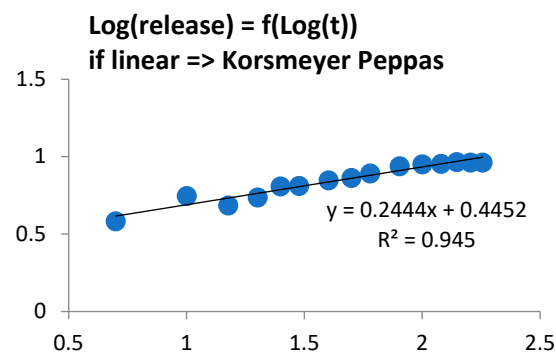

**Figure S4.** Mathematical fitting of MO release from MgFeCO<sub>3</sub> LDH monolith (from cold sintering) relatively to several models (t is given in minutes and the release rate in %).

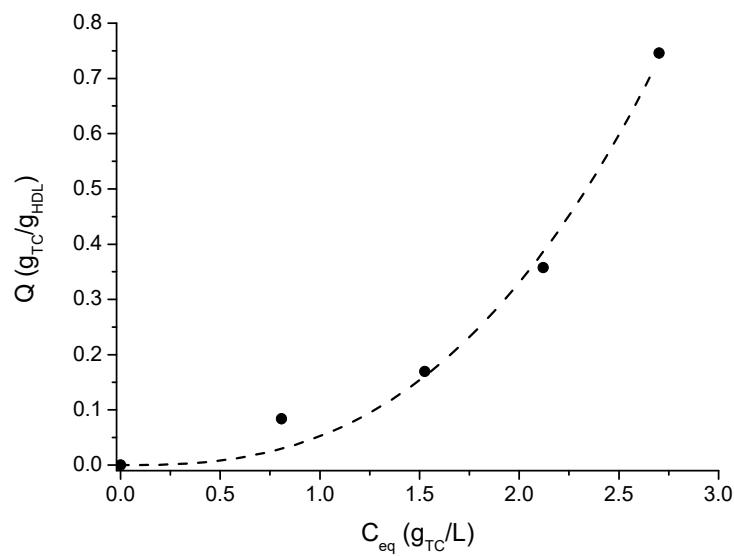

**Figure S5.** Isotherm of interaction between TC molecules and MgFeCO<sub>3</sub> LDH powder. The dotted line depicts the fit with Sips isotherm. Error bars are included but not visible (standard deviations correspond to 0.6% of the mean).

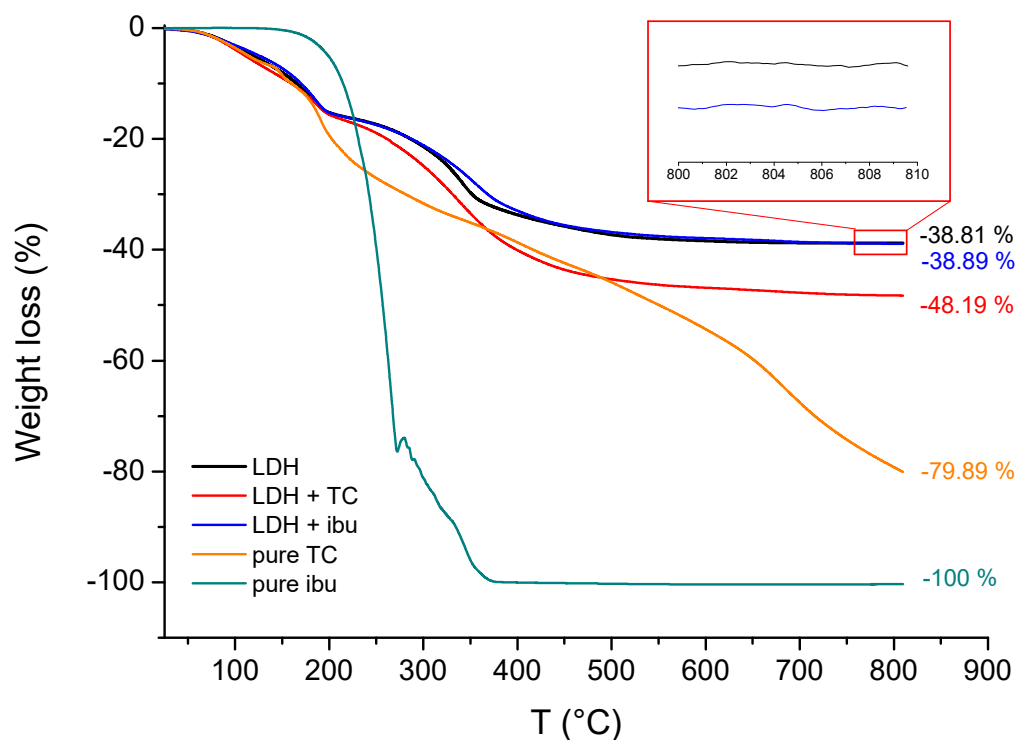

**Figure S6.** Thermogravimetry data on pure  $\text{MgFeCO}_3$  LDH powder, tetracycline (TC), ibuprofene (ibu), and combined LDH-TC and LDH-ibu compounds.

**Table S1.** Correlation coefficient for the mathematical fit of the kinetics of adsorption of MO on  $\text{MgFeCO}_3$  in powder or monoliths forms, using the pseudo-first order, pseudo-second order and Elovich kinetic models.

| Sample                             | Kinetic model       | R <sup>2</sup> |
|------------------------------------|---------------------|----------------|
| MgFe-CO <sub>3</sub> -LDH powder   | Pseudo first order  | 0.9153         |
|                                    | Pseudo second order | 0.9505         |
|                                    | Elovich             | 0.9689         |
| MgFe-CO <sub>3</sub> -LDH monolith | Pseudo first order  | 0.9742         |
|                                    | Pseudo second order | 0.9895         |
|                                    | Elovich             | 0.9992         |
